# Supplementary material for: Width effects on bilayer graphene nanoribbon polarons
Source: Royal Society of Chemistry journal article supplement (doi:10.1039/d4cp00760c), 2024-01-01
Supplement: d4cp00760c1.pdf [file d4cp00760c1.pdf]

## Electronic Supplementary Information for: Width Effects on Bilayer Graphene Nanoribbon Polarons

André Lima Logrado<sup>1</sup>, Tiago de Sousa Araújo Cassiano<sup>1</sup>, Wiliam Ferreira da Cunha<sup>1</sup>, Ricardo Gargano<sup>1</sup>, Geraldo Magela e Silva<sup>1</sup>, and Pedro Henrique de Oliveira Neto<sup>1,2,\*</sup>

<sup>1</sup> *University of Brasília, Institute of Physics, 70.910-900, Brasília, Brazil*

<sup>2</sup> *International Center of Physics, University of Brasília, 70919-970, Brazil*  
*pedrohenrique@unb.br\**

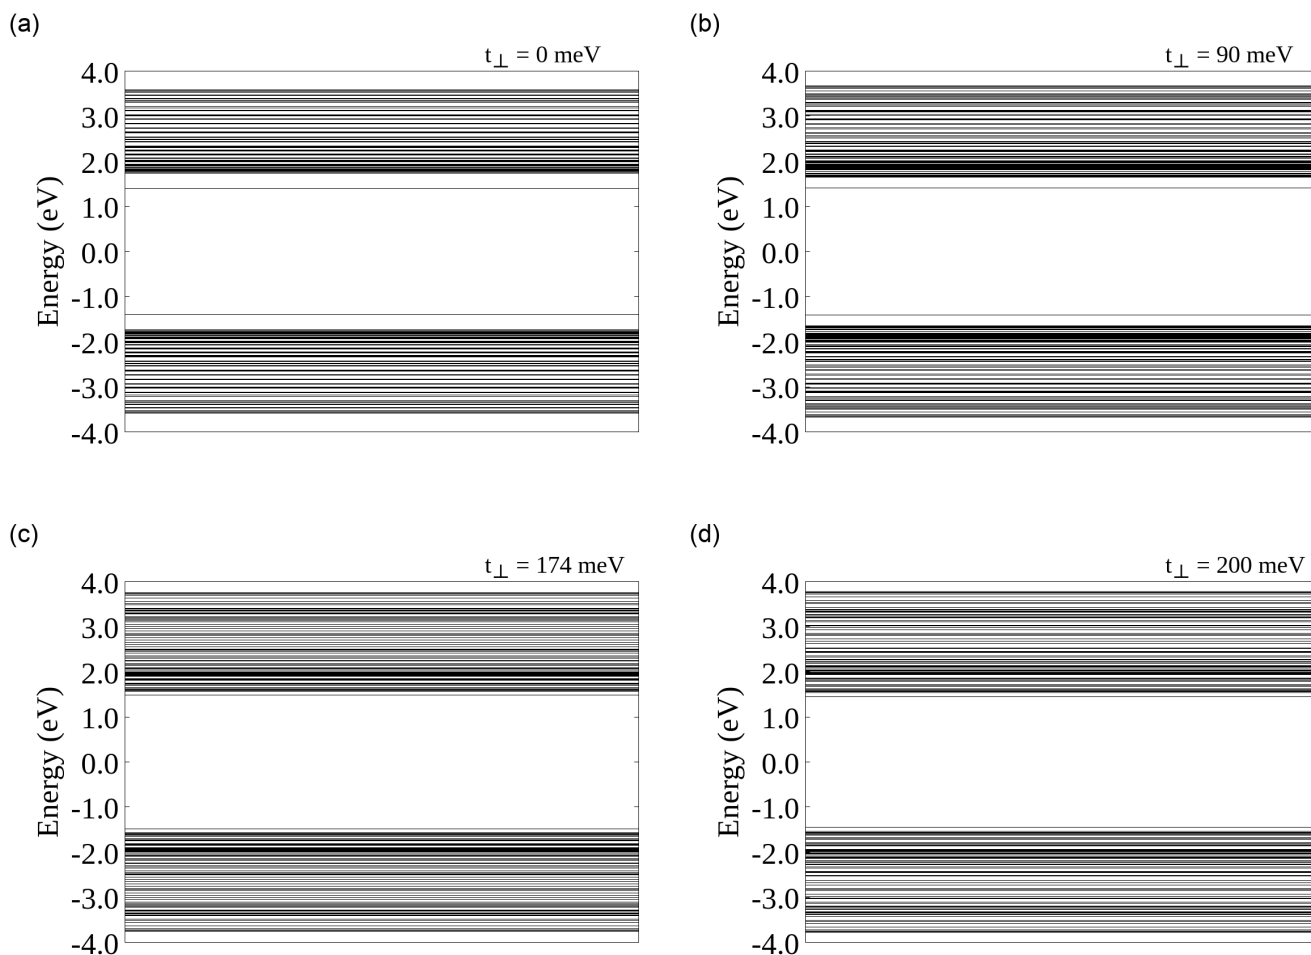

Figure S1: B4A electronic spectra for  $t_{\perp} = 0$  eV (a), an intermediate case when  $t_{\perp} < t_{\perp}^c$  (b),  $t_{\perp} = t_{\perp}^c$  (c), and an example when  $t_{\perp} > t_{\perp}^c$  (d).

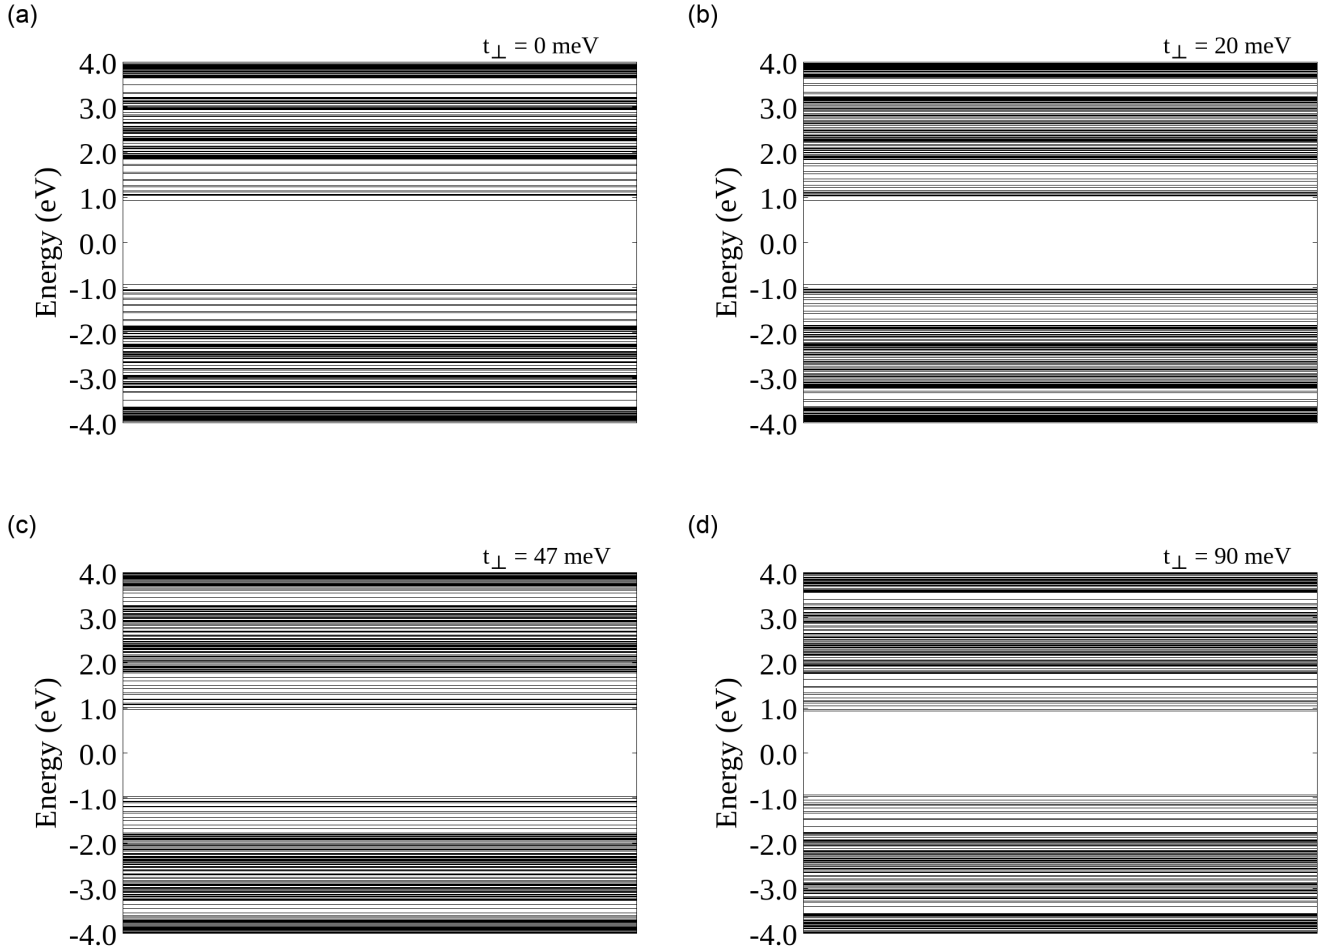

Figure S2: B6A electronic spectra for  $t_{\perp} = 0$  eV (a), an intermediate case when  $t_{\perp} < t_{\perp}^c$  (b),  $t_{\perp} = t_{\perp}^c$  (c), and an example when  $t_{\perp} > t_{\perp}^c$  (d).

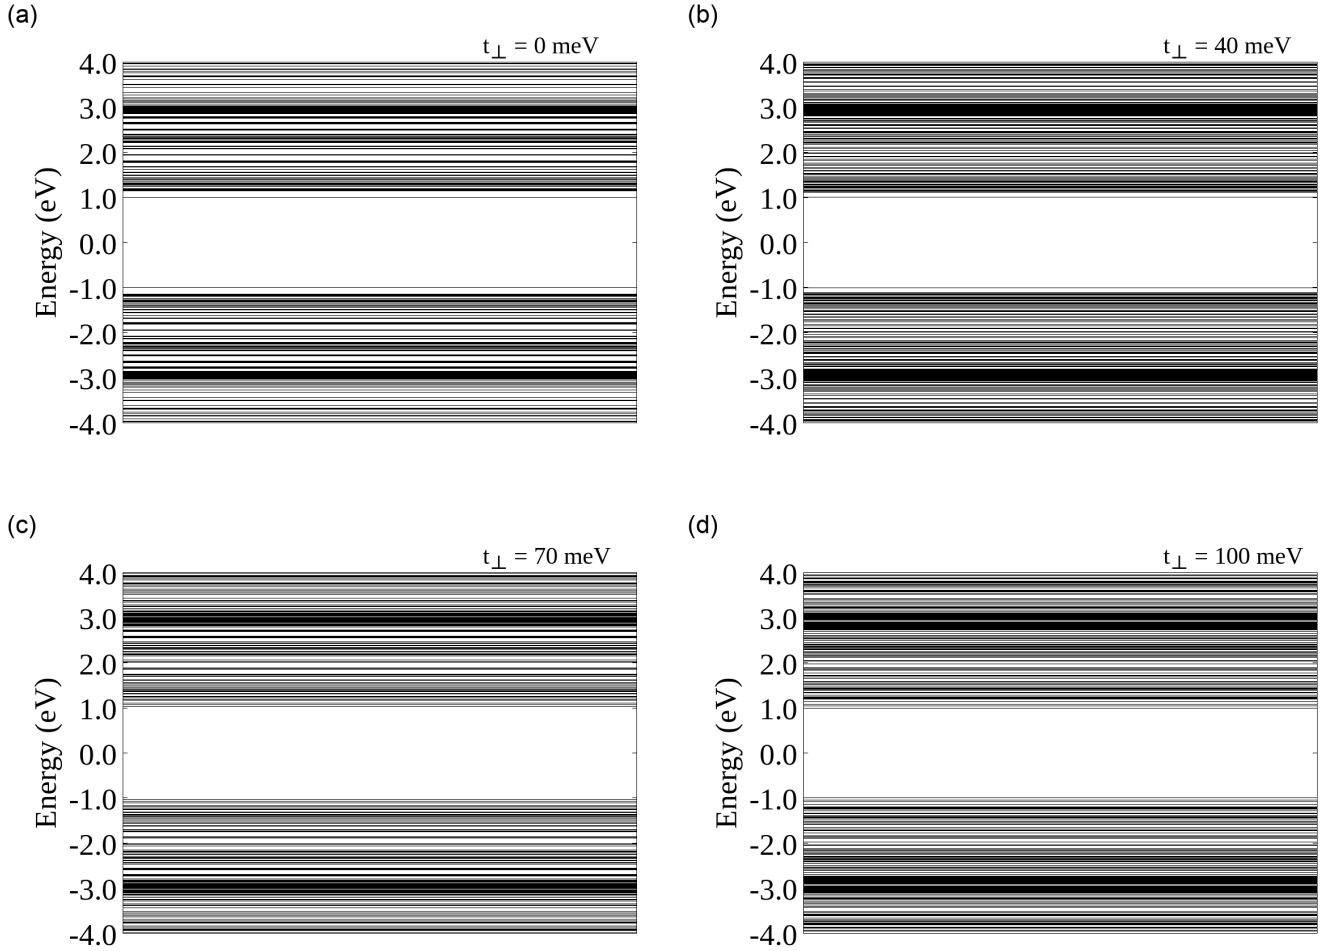

Figure S3: B7A electronic spectra for  $t_{\perp} = 0$  eV (a), an intermediate case when  $t_{\perp} < t_{\perp}^c$  (b),  $t_{\perp} = t_{\perp}^c$  (c), and an example when  $t_{\perp} > t_{\perp}^c$  (d).

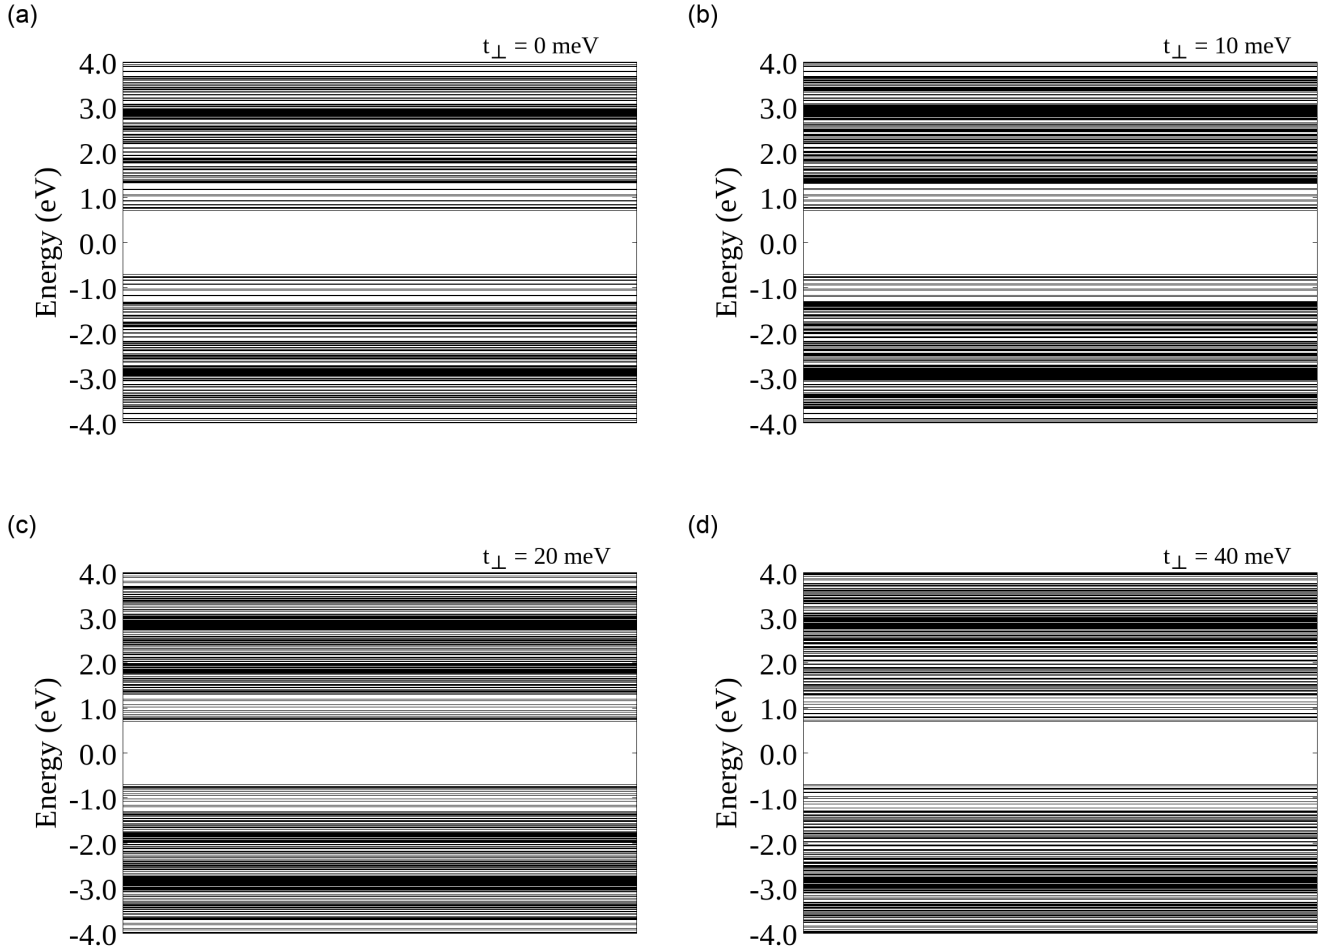

Figure S4: B9A electronic spectra for  $t_{\perp} = 0 \text{ eV}$  (a), an intermediate case when  $t_{\perp} < t_{\perp}^c$  (b),  $t_{\perp} = t_{\perp}^c$  (c), and an example when  $t_{\perp} > t_{\perp}^c$  (d).

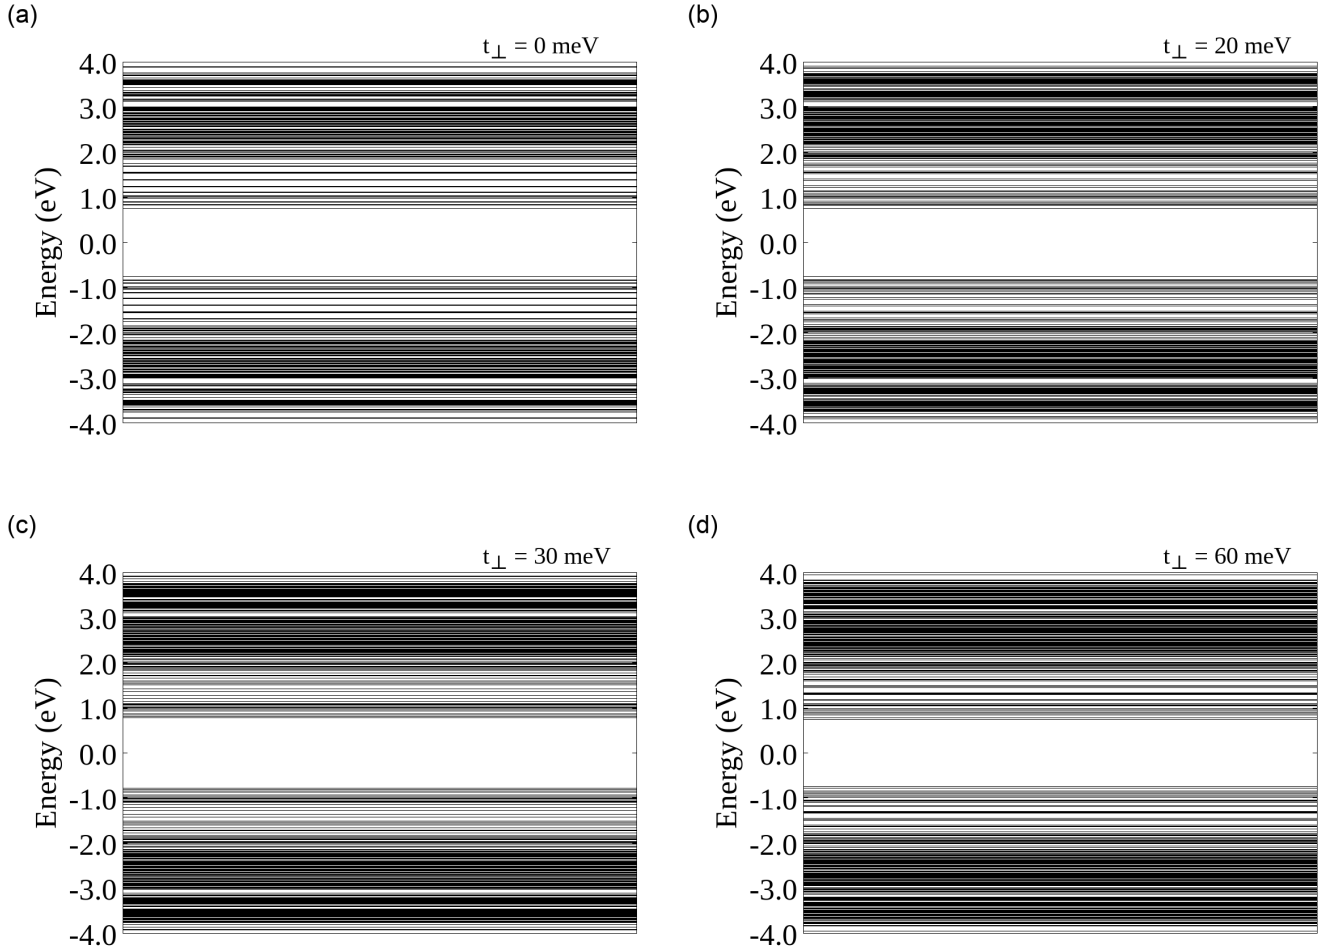

Figure S5: B10A electronic spectra for  $t_{\perp} = 0$  eV (a), an intermediate case when  $t_{\perp} < t_{\perp}^c$  (b),  $t_{\perp} = t_{\perp}^c$  (c), and an example when  $t_{\perp} > t_{\perp}^c$  (d).

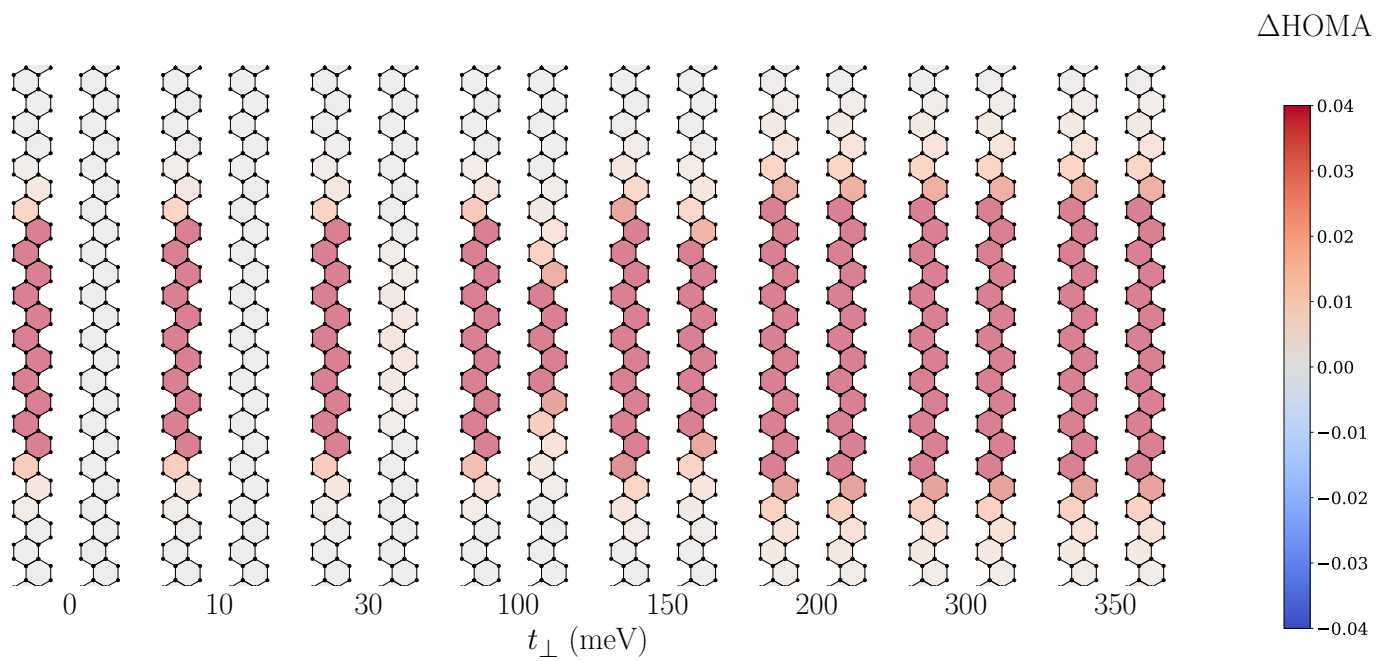

Figure S6: B4A  $\Delta\text{HOMA}$  profile for different interlayer coupling strengths.

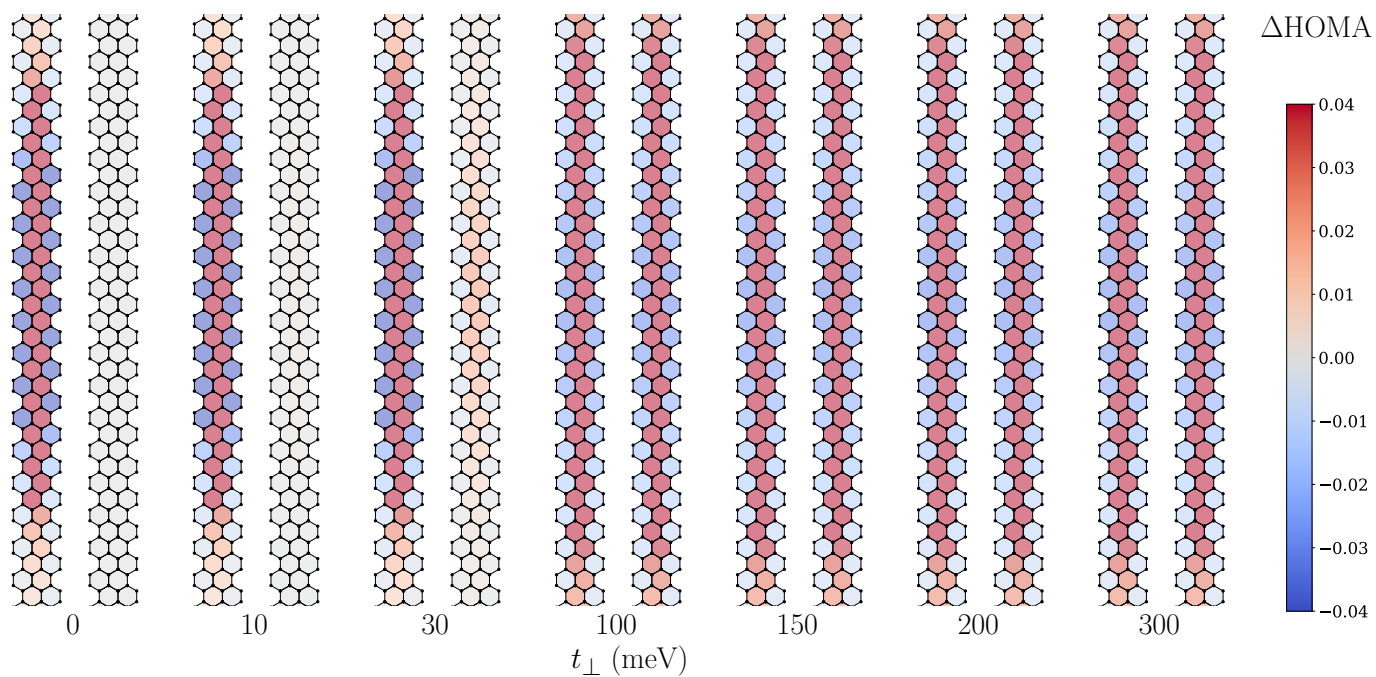

Figure S7: B6A  $\Delta\text{HOMA}$  profile for different interlayer coupling strengths.

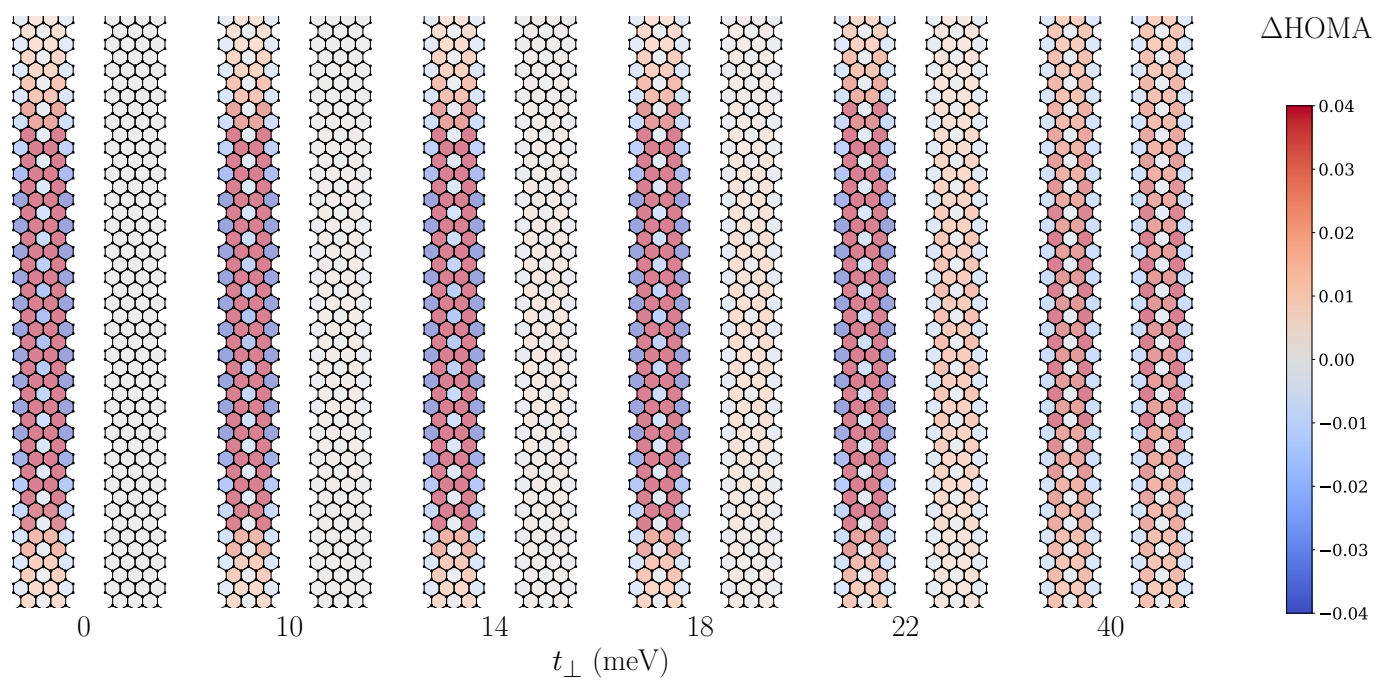

Figure S8: B9A  $\Delta\text{HOMA}$  profile for different interlayer coupling strengths.

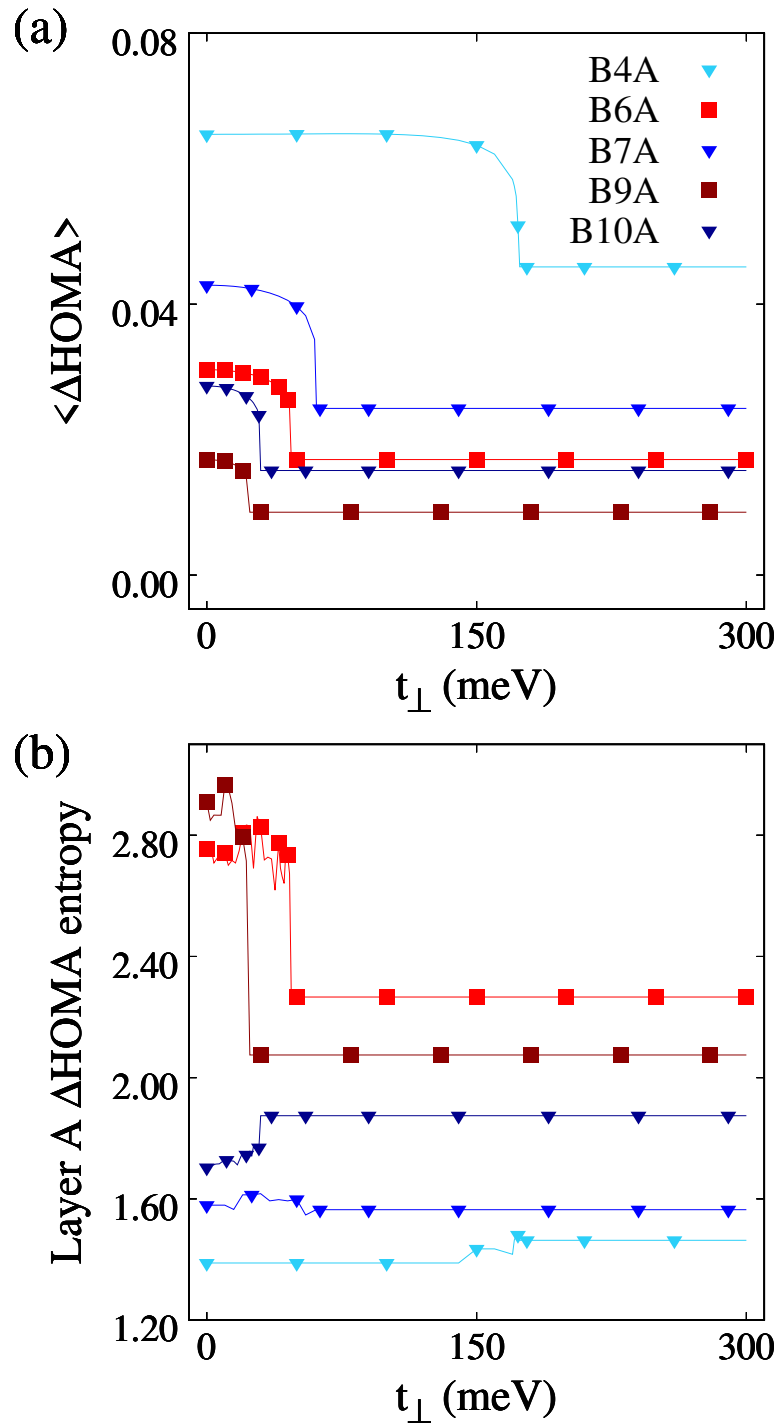

Figure S9: (a): average of  $\Delta\text{HOMA}$  as a function of  $t_{\perp}$ . (b): Shannon entropy of layer A  $\Delta\text{HOMA}$  distribution as a function of  $t_{\perp}$ .
